# Supplementary material for: Early predictive factors for severe postoperative complications following major liver and pancreatic surgery: A single-center retrospective study
Source: Research Square preprint supplement (doi:10.21203/rs.3.rs-7493031/v1), 2025-09-30
Supplement: Supplementary file 1 [file cd8d8316b693cbed8069757e.docx]

**Supplemental Table 1. Comparison of patient characteristics between PSC group and non-PSC group.**

|  | PSC group  (n=167) | Non-PSC group  (n=161) | *p*-value |
| --- | --- | --- | --- |
| Age (years) | 71 [65-77] | 70 [65-77] | 0.77 |
| Sex | Male: 117 (70.1%)  Female: 50 (29.9%) | Male: 97 (60.3%)  Female: 64 (39.7%) | 0.06 |
| BMI (kg/m2) | 22.0 [20.1-24.0] | 21.6 [19.7-23.9] | 0.30 |
| ASA | 1: 20 (12.0%)  2: 124 (74.3%)  3: 23 (13.8%) | 1: 20 (12.4%)  2: 124 (77.0%)  3: 17 (10.6%) | 0.67 |
| Smoking habits | 96 (64.4%) | 78 (54.2%) | 0.07 |
| Brinkman index | 400 [0-800] | 200 [0-870] | 0.37 |
| Past abdominal surgery | 73 (43.7%) | 61 (37.9%) | 0.28 |
| Preoperative chemotherapy | 36 (21.6%) | 40 (24.8%) | 0.48 |
| PNI | 47.5 [42.9-50.2] | 46.6 [43.1-49.9] | 0.49 |
| CONUT | Normal (0-1):56 (33.9%)  Mild (2-4):96 (58.2%)  Moderate (5-8):10 (6.1%)  Severe (9-12):3 (1.82%) | Normal (0-1):66 (43.4%)  Mild (2-4):66 (43.4%)  Moderate (5-8):20 (13.2%)  Severe (9-12):0 (0.0%) | < 0.01** |
| Preoperative CAR | 0.03 [0.01-0.08] | 0.02 [0.01-0.09] | 0.24 |
| Preoperative NLR | 2.3 [1.6-3.2] | 2.2 [1.6-3.0] | 0.74 |
| Preoperative PLR | 141.6 [106.0-193.1] | 149.8 [112.5-186.0] | 0.70 |
| Charlson comorbidity index | 2 [1-3] | 2 [1-3] | 0.57 |
| History of malignancy | 57 (34.1%) | 43 (26.9%) | 0.15 |
| Heart-related comorbidity | 33 (19.8%) | 34 (21.1%) | 0.76 |
| Respiratory-related  Comorbidity | 28 (16.8%) | 16 (9.9%) | 0.07 |
| Liver-related  Comorbidity | 28 (16.8%) | 29 (18.0%) | 0.77 |
| Cerebrovascular-related  Comorbidity | 13 (7.8%) | 15 (9.3%) | 0.62 |
| Diabetes mellitus | 58 (34.7%) | 61 (37.9%) | 0.55 |
| Chronic renal dysfunction | 43 (25.8%) | 35 (21.7%) | 0.39 |
| Type of surgery | Liver: 49 (29.3%)  Pancreatic: 118 (70.7%) | Liver: 53 (32.9%)  Pancreatic: 108 (67.1%) | 0.48 |
| Multiple organ resection | 22 (13.2%) | 30 (18.6%) | 0.23 |
| Operation time (min) | 416 [328-534] | 423 [326-527] | 0.89 |
| Blood loss (ml) | 685 [430-1100] | 685 [360-983] | 0.35 |
| Blood transfusion | 45 (27.0%) | 43 (26.7%) | 0.96 |
| Hospital stay (days) | 40 [29-52] | 24 [17-32] | < 0.001*** |

PSC: postoperative severe complication

OR: odds ratio

95%CI: 95% confidence interval

BMI: body mass index

ASA: American Society of Anesthesiologists physical status classification

PNI: Prognostic nutritional index=10×albumin(g/dl) + 0.005× the absolute lymphocyte count

CONUT: Controlling Nutritional Status

CAR: C-reactive protein to albumin ratio

NLR: Neutrophil to lymphocyte ratio

PLR: Platelet to lymphocyte ratio

POD: Postoperative day

*: p< 0.05 **: p< 0.01 ***: p< 0.001
